# Supplementary material for: Fabrication of Silk Fibroin Fluorescent Nanofibers via Electrospinning
Source: PubMed Central journal article supplement (PMC6631164; doi:10.3390/polym11060986), 2019-06-04
Supplement: polymers-11-00986-s001.pdf [file polymers-11-00986-s001.pdf]

## Supplementary information

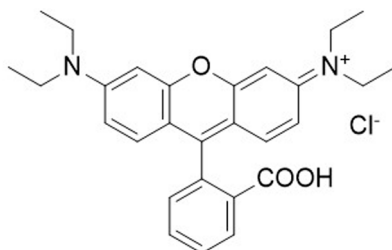

**Figure S1** Chemical formula of rhodamine B (RB)

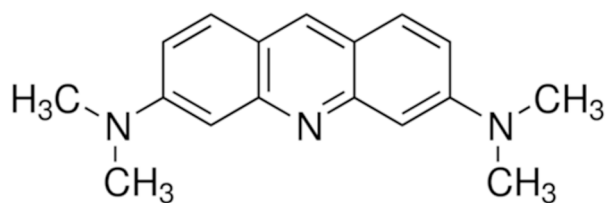

**Figure S2** Chemical formula of acridine orange (AO)

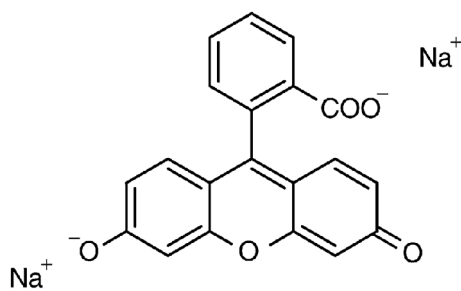

**Figure S3** Chemical formula of fluorescein sodium (FS)

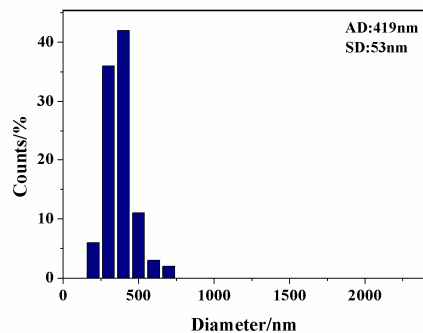

(a)

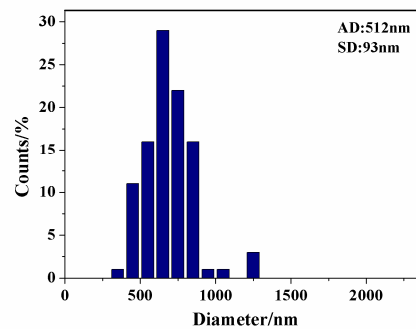

(b)

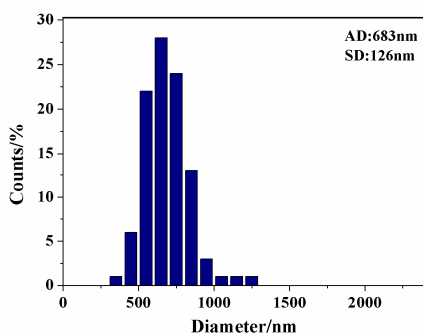

(c)

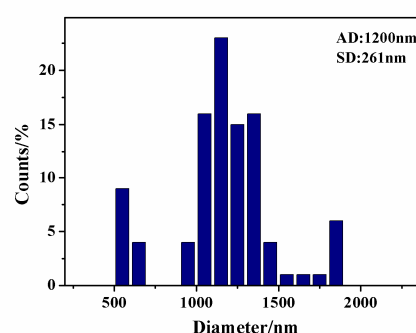

(d)

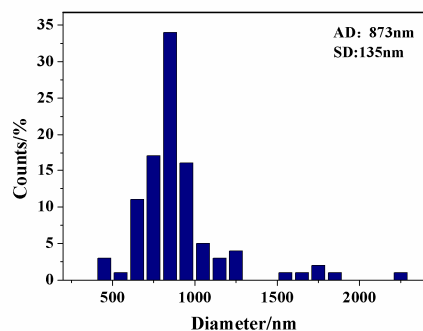

(e)

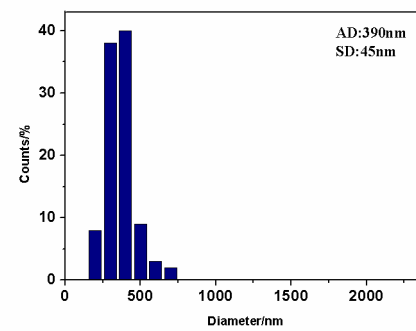

(f)

**Figure S4** SEM images of diameter distributing of fluorescent SF-FS nanofibers with different SF and FS concentration. The concentration of SF was (a) 6.0 wt%, (b) 8.0 wt%, and (c,d,e) 10.0 wt%. The concentration of FS was (a,b,c) 1.0 wt%, (d) 0.5 wt%, and (e) 2.0 wt%, respectively. (f) pure SF nanofibers with 6.0 wt% SF concentration.

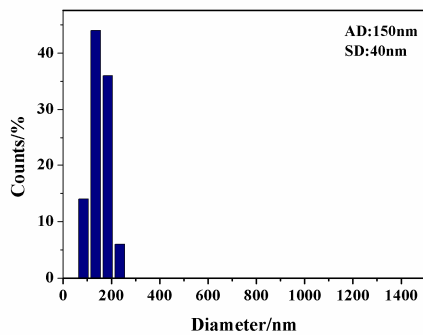

(a)

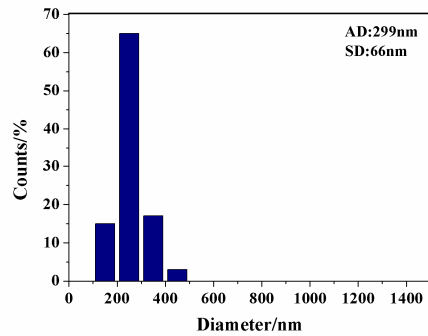

(b)

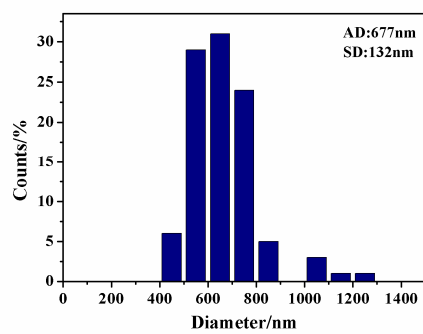

(c)

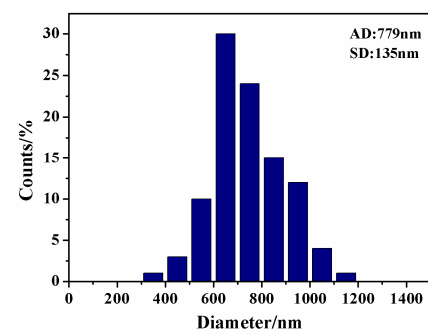

(d)

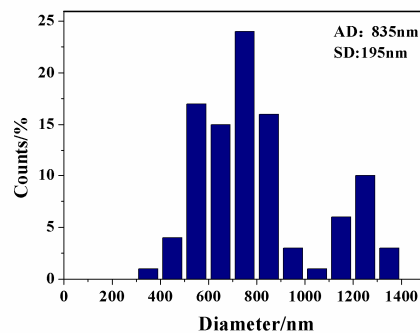

(e)

**Figure S5** SEM images of diameter distributing of fluorescent SF-RB nanofibers with different SF and RB concentration. The concentration of SF was (a) 6.0 wt%, (b) 8.0 wt%, (c,d,e) 10.0 wt%. The concentration of RB was (a,b,c) 1.0 wt%, (d) 0.5 wt%, and (e) 2.0 wt%, respectively.

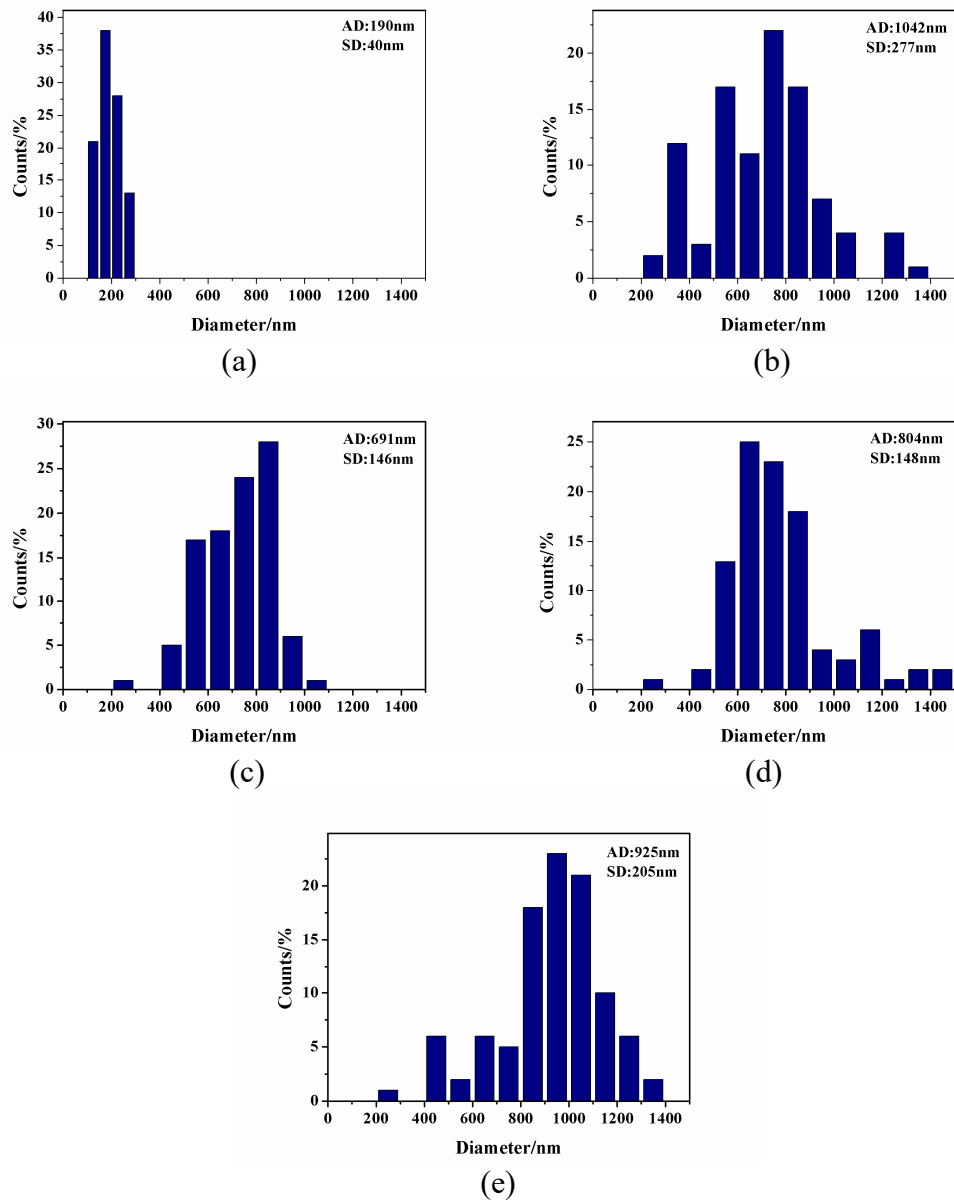

**Figure S6** SEM images of diameter distributing of fluorescent SF-AO nanofibers with different SF and AO concentration. The concentration of SF was (a) 6.0 wt%, (b) 8.0 wt%, (c,d,e) 10.0 wt%. The concentration of AO was (a,b,c) 1.0 wt%, (d) 0.5 wt%, and (e) 2.0 wt%, respectively.
